# Supplementary material
Source: PubMed Central journal article supplement (PMC7187828)
Supplement: mmc2.pdf [file mmc2.pdf]

# COVID-19: How to Apply for Medicare Accelerated and Advance Payments

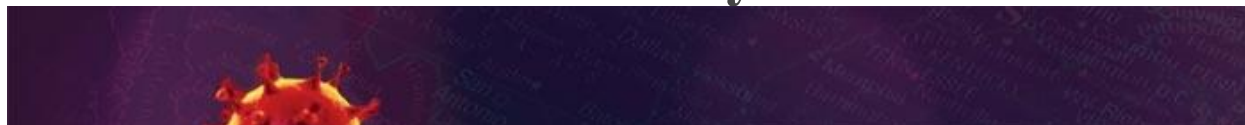

**Applying for Medicare relief funding can be confusing. Let us help.**

CMS expanded its current [Accelerated and Advance Payment Program](http://www.cms.gov)(www.cms.gov), which allows physician practices to request an advance of up to 100% of the Medicare payment amount for a three-month period.

[Read more about the program expansion »](#)

The AAFP knows you don't have time to track down your Medicare Administrative Contact (MAC), so we created the table below. Use it to find your state or region, a direct link to fill out your specific form, and where to send the form when you're ready.

| STATES/REGIONS                                                                                                                                                                                       | MAC                                                                                      | REGION-SPECIFIC INSTRUCTIONS & FORMS                                                 | CONTACT INFORMATION                        |
|------------------------------------------------------------------------------------------------------------------------------------------------------------------------------------------------------|------------------------------------------------------------------------------------------|--------------------------------------------------------------------------------------|--------------------------------------------|
| KY, OH<br>Home health & hospice claims for the following states: DE, DC, CO, IA, KS, MD, MO, MT, NE, ND, PA, SD, UT, VA, WV, & WY                                                                    | <a href="#">CGS Administrators, LLC (CGS) - Jurisdiction 15</a>                          | <a href="#">Instructions Form</a>                                                    | 1-855-769-9920<br>7:00 a.m. - 4:00 p.m. CT |
| FL, PR, US VI                                                                                                                                                                                        | <a href="#">First Coast Service Options Inc. (FCSO) - Jurisdiction N</a>                 | <a href="#">Instructions Form</a>                                                    | 1-855-247-8428<br>8:30 a.m. - 4:00 PM ET   |
| CT, IL, ME, MA, MN, NY, NH, RI, VT, WI<br>Home health & hospice claims for the following states: AK, AS, AZ, CA, CT, GU, HI, ID, MA, ME, MI, MN, NH, NV, NJ, NY, MP, OR, PR, RI, US VI, VT, WI, & WA | <a href="#">National Government Services (NGS) - Jurisdiction 6 &amp; Jurisdiction K</a> | <a href="#">Instructions Form</a>                                                    | 1-888-802-3898<br>8:00 a.m. - 4:00 p.m. CT |
| AR, CO, DE, DC, LA, MS, MD, NJ, NM, OK, PA, TX, (includes Part B for counties of Arlington &                                                                                                         | <a href="#">Novitas Solutions, Inc. - Jurisdiction H &amp; Jurisdiction L</a>            | <b>Jurisdiction H</b><br>AR, CO, LA, MS, NM, OK, TX, Indian Health & Veteran Affairs | 1-855-247-8428<br>8:30 a.m. - 4:00 p.m. ET |

| STATES/REGIONS                                                                                                                                                                                                                                       | MAC                                                                                      | REGION-SPECIFIC INSTRUCTIONS & FORMS                                                                                                                                                                                                                                                                          | CONTACT INFORMATION                        |
|------------------------------------------------------------------------------------------------------------------------------------------------------------------------------------------------------------------------------------------------------|------------------------------------------------------------------------------------------|---------------------------------------------------------------------------------------------------------------------------------------------------------------------------------------------------------------------------------------------------------------------------------------------------------------|--------------------------------------------|
| Fairfax in VA & the city of Alexandria in VA)                                                                                                                                                                                                        |                                                                                          | <a href="#">Instructions Form</a><br><br><b>Jurisdiction L</b><br>DC, DE, MD, NJ & PA<br><a href="#">Instructions Form</a>                                                                                                                                                                                    |                                            |
| AK, AZ, CA, HI, ID, MT, ND, NV, OR, SD, UT, WA, WY, AS, GU, MP                                                                                                                                                                                       | <a href="#">Noridian Healthcare Solutions - Jurisdiction E &amp; Jurisdiction F</a>      | <b>Jurisdiction E</b><br>California, Hawaii, Nevada, American Samoa, Guam, Northern Mariana Islands)<br><a href="#">Instructions Form</a><br><br><b>Jurisdiction F</b><br>Alaska, Arizona, Idaho, Montana, North Dakota, Oregon, South Dakota, Utah, Washington, Wyoming<br><a href="#">Instructions Form</a> | 1-866-575-4067<br>8:00 a.m. - 6:00 p.m. CT |
| AL, GA, NC, SC, TN, VA (excludes Part B for the counties of Arlington & Fairfax in VA & the city of Alexandria in VA), WV<br>Home health & hospice claims for the following states: AL, AR, FL, GA, IL, IN, KY, LA, MS, NM, NC, OH, OK, SC, TN, & TX | <a href="#">Palmetto GBA - Jurisdiction J &amp; Jurisdiction M</a>                       | <b>Jurisdiction J</b><br>Alabama, Georgia & Tennessee<br><a href="#">Instructions Form</a><br><br><b>Jurisdiction M</b><br>North & South Carolina, Virginia & West Virginia<br><a href="#">Instructions Form</a>                                                                                              | 1-833-820-6138<br>8:30 a.m. - 5:00 p.m. ET |
| IN, MI, IA, KS, MO, NE                                                                                                                                                                                                                               | <a href="#">Wisconsin Physician Services (WPS) - Jurisdiction 5 &amp; Jurisdiction 8</a> | <a href="#">Instructions Form</a>                                                                                                                                                                                                                                                                             | 1-844-209-2567<br>7:00 a.m. - 4:00 p.m. CT |
