# Supplementary material
Source: PubMed Central journal article supplement (PMC7187828)
Supplement: mmc4.pdf [file mmc4.pdf]

# EIDL Disaster Application Overview

1. Getting Registered
2. Submitting Application – for all BUT Sole Proprietor
  - The form 5, IRS 4506T form, Personal Financial Statements, Schedule of Liabilities and Tax Returns.
3. Submitting Application ONLY for Sole Proprietor
  - The form 5C, IRS 4506T form, Personal Financial Statement, Schedule of Liabilities and Tax Returns.
4. Checking Status of Your Application

Getting Registered

# Disaster Loan Application Portal

<https://disasterloan.sba.gov/ela/>

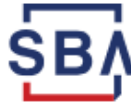

U.S. Small Business Administration

[FAQs](#) [Help](#) [Contact Us](#) [Register](#) [Login](#)

[Loan Information](#) [Search Declarations](#) [Apply Online](#)

## Disaster Loan Assistance

Federal Disaster Loans for **Businesses, Private Nonprofits, Homeowners, and Renters**

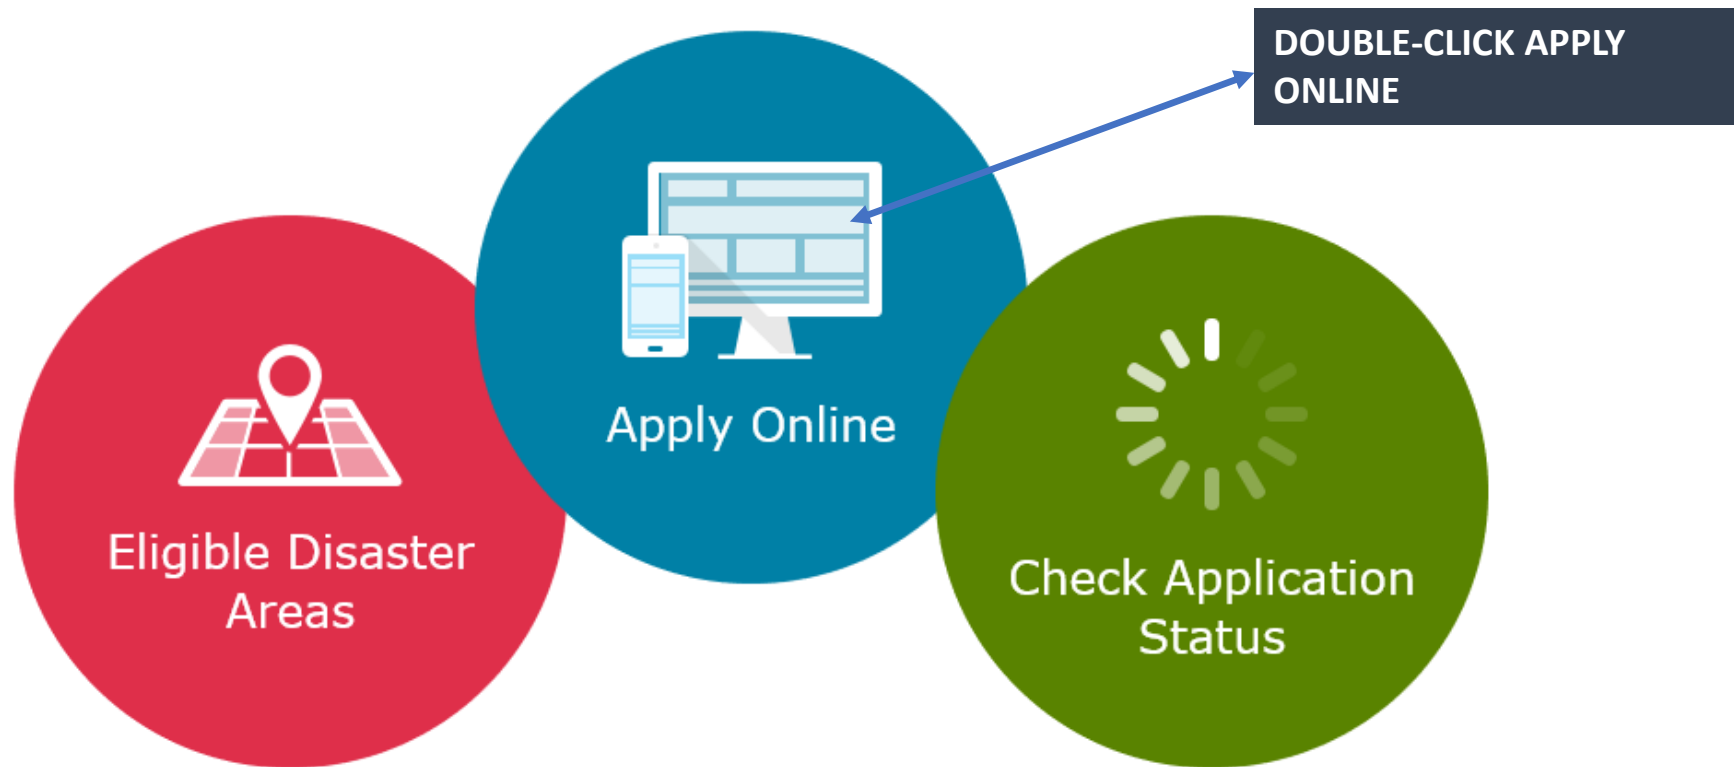

# Register

From this page you can:

1) Begin a new application by clicking on Register

2) Return to complete a started application by inputting a user name and password

**SBA** U.S. Small Business Administration

FAQs Help Contact Us Register Login

[Loan Information](#) [Search Declarations](#) [Apply Online](#)

## Disaster Loan Assistance

Federal Disaster Loans for Businesses, Private Nonprofits, Homeowners, and Renters

Login Register Password Reset

### Disaster Loan Assistance - Login

\*User Name  
User Name

\*Password  
Password

Login ▶

[System Requirements](#)  
The recommended browser is Internet Explorer 10 or later.

- If you have dial-up Internet service, you may experience delays.
- You must have cookies and JavaScript enabled.
- You should allow pop-up messages.
- You must have Adobe Reader installed.

Get ADOBE READER

### Notice - Terms of Use

This is a Federal computer system and is the property of the United States Government. It is for authorized use only. Users (authorized or unauthorized) have no explicit or implicit expectation of privacy in anything viewed, created, downloaded, or stored on this system, including e-mail, Internet, and intranet use. Any or all uses of this system (including all peripheral devices and output media) and all files on this system may be intercepted, monitored, read, captured, recorded, disclosed, copied, audited, and/or inspected by authorized Small Business Administration (SBA) personnel, the Office of Inspector General (OIG), and/or other law enforcement personnel, as well as authorized officials of other agencies, both domestic and foreign.

Access or use of this computer system by any person, whether authorized or unauthorized, constitutes consent to such interception, monitoring, reading, capturing, recording, disclosure, copying, auditing, and/or inspection at the discretion of authorized SBA personnel, law enforcement personnel (including the OIG), and/or authorized officials of other agencies, both domestic and foreign. Unauthorized use of, or exceeding authorized access to, this system is prohibited and may constitute a violation of 18 U.S.C. § 1030 or other Federal laws and regulations and may result in criminal, civil, and/or administrative action. By continuing to use this system, you indicate your awareness of, and consent to, these terms and conditions and acknowledge that there is no reasonable expectation of privacy in the access or use of this computer system.

**PLEASE NOTE:** Your responses to the requested information are required in order to obtain a benefit under our Disaster Loan Program. However, you are not required to respond to any collection of information unless it displays a currently valid OMB control number.

# Complete Registration Information

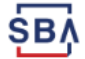

U.S. Small Business Administration

[FAQs](#) [Help](#) [Contact Us](#) [Register](#) [Login](#) [Apply Online](#)

## Disaster Loan Assistance

Federal Disaster Loans for Businesses, Private Nonprofits, Homeowners, and Renters

### User Registration (Part 1 of 2)

The registration information that you provide will be used to verify your identity and for future logins. Please ensure that this information is accurate and correct.

**WARNING** - For your security, navigating away from either of the registration pages before the registration process is completed will clear out any information entered. To ensure your registration is successful, complete part 1 and part 2 of the registration process completely.

#### Personal Information

|                                          |                                         |                                     |                                  |
|------------------------------------------|-----------------------------------------|-------------------------------------|----------------------------------|
| *First Name                              | MI                                      | *Last Name                          | Suffix                           |
| <input type="text" value="Chadwick"/>    | <input type="text" value="G"/>          | <input type="text" value="Nelson"/> | <input type="text" value="Sr."/> |
| *Social Security Number                  | *Date of Birth                          |                                     |                                  |
| <input type="text" value="415-31-1234"/> | <input type="text" value="12/15/1985"/> |                                     |                                  |

#### Primary Address (Prior to the Disaster)

|                                                      |                                                      |                                                                           |                                      |
|------------------------------------------------------|------------------------------------------------------|---------------------------------------------------------------------------|--------------------------------------|
| *Address Line 1                                      |                                                      |                                                                           |                                      |
| <input type="text" value="123 Main"/>                |                                                      |                                                                           |                                      |
| Address Line 2                                       | <input type="text" value="Address Line 2"/>          |                                                                           |                                      |
| *City                                                | *State                                               | *Zip Code                                                                 | County                               |
| <input type="text" value="Herndon"/>                 | <input type="text" value="Virginia"/>                | <input type="text" value="20174"/>                                        | <input type="text" value="Fairfax"/> |
| Email Address                                        | Re-enter Email Address                               | <input checked="" type="checkbox"/> Receive status notifications by email |                                      |
| <input type="text" value="marilynsdogan@gmail.com"/> | <input type="text" value="marilynsdogan@gmail.com"/> |                                                                           |                                      |

As an additional security measure, we will be sending a separate pass code to your phone or email which you will need to log in to the disaster loan application once you complete the registration process. You must have access to your phone or email to receive your pass code to login.

|                                           |                                           |
|-------------------------------------------|-------------------------------------------|
| *Primary Phone Number                     | Alternate Phone Number                    |
| <input type="text" value="817-845-3369"/> | <input type="text" value="404-909-1585"/> |

I acknowledge and understand that third parties are providing information or services to the U.S. Small Business Administration in order for the U.S. Small Business Administration to authenticate my identity. I agree to hold harmless said third parties and indemnify said third parties from any and all liability resulting from my use of the authentication services.

Items with a \* must be completed. Include good email address and cell phone number.

**WARNING** - For your security, navigating away from either of the registration pages before the registration process is completed will clear out any information entered. To ensure your registration is successful, complete part 1 and part 2 of the registration process completely.

#### User Data

|                                                                                                                                                                                                                    |                                                                                       |
|--------------------------------------------------------------------------------------------------------------------------------------------------------------------------------------------------------------------|---------------------------------------------------------------------------------------|
| *User Name                                                                                                                                                                                                         | <input type="text" value="chadnelson"/>                                               |
| (Must be at least 6 characters)                                                                                                                                                                                    |                                                                                       |
| *Password                                                                                                                                                                                                          | <input type="password" value="*****"/>                                                |
| (Must be at least 8 characters and must contain at least three of the following items: one uppercase letter, one lowercase letter, one number, one special character from this list: !@#\$%^&*()_+=[\]{} :;".<>/?) |                                                                                       |
| *Confirm Password                                                                                                                                                                                                  | <input type="password" value="*****"/>                                                |
| Your passwords must match                                                                                                                                                                                          |                                                                                       |
| *Security Question 1                                                                                                                                                                                               | <input type="text" value="In what city and country do you want to retire?"/>          |
| *Security Answer 1                                                                                                                                                                                                 | <input type="text" value="Atlanta USA"/>                                              |
| *Security Question 2                                                                                                                                                                                               | <input type="text" value="In what city did you meet your spouse/significant other?"/> |
| *Security Answer 2                                                                                                                                                                                                 | <input type="text" value="New York"/>                                                 |
| *Security Question 3                                                                                                                                                                                               | <input type="text" value="In what city was the company where you first worked?"/>     |
| *Security Answer 3                                                                                                                                                                                                 | <input type="text" value="New Orleans"/>                                              |

**Please type the text appearing in the image below:**  
Note: If you cannot view the image for any reason, please click on the speaker icon to hear the code. Then enter the code in the box below.



\*Enter Code

On Pg 2 create user-name and password. Be sure to remember security questions!!

# Starting the Application Process

# Apply Online

The screenshot shows the SBA website's 'Disaster Loan Assistance' page. At the top left is the SBA logo and 'U.S. Small Business Administration'. On the top right are navigation links: 'FAQs', 'Help', 'Contact Us', 'My Account', and 'Logout'. Below these are four main navigation buttons: 'Loan Information', 'Search Declarations', 'Apply Online', and 'Message Center'. The main heading is 'Disaster Loan Assistance' in large blue font, with the subtitle 'Federal Disaster Loans for Businesses, Private Nonprofits, Homeowners, and Renters'. Underneath is the section 'Loan Type Selection' with two large blue buttons. The left button is titled 'Businesses and Non-Profits' and features icons of a wallet, a building, and a storefront. The right button is titled 'Homeowners and Renters' and features icons of a car, a house, and a boat. A dark grey callout box on the left contains the text 'Double Click on Business and Non Profit' with an arrow pointing to the left button. At the bottom of the page, there are three links: 'SBA.gov', '3-Step Loan Process', and 'FEMA Disaster Assistance'.

SBA U.S. Small Business Administration

FAQs Help Contact Us My Account Logout

Loan Information Search Declarations Apply Online Message Center

## Disaster Loan Assistance

Federal Disaster Loans for Businesses, Private Nonprofits, Homeowners, and Renters

### Loan Type Selection



#### Businesses and Non-Profits

Loans for repair or replacement of disaster damaged business property and/or contents and/or economic injury (including owners of rental properties)



#### Homeowners and Renters

Loans to Homeowners and Renters for the repair or replacement of disaster damaged real estate and/or personal property (including vehicles)

SBA.gov 3-Step Loan Process FEMA Disaster Assistance

Double Click on Business and Non Profit

# Business and Loss Type

 [FAQs](#) [Help](#) [Contact Us](#) [My Account](#) [Logout](#) 

[Loan Information](#) [Search Declarations](#) [Apply Online](#) [Message Center](#)

## Disaster Loan Assistance

Federal Disaster Loans for Businesses, Private Nonprofits, Homeowners, and Renters

**Disaster Loan Application** [Save](#)

### Business Losses

**\*Please select the type of organization that best describes your business.**

- Sole-Proprietor *(including individuals with income properties)*
- Corporation
- Partnership
- Private Non-Profit Organization *(e.g. religious, charitable, community organizations)*
- Limited Partnership
- Trust
- Limited Liability Entity *(LLC, LLP, etc.)*

**\*Are you applying for: (check all that apply)**

- Real Property *(including Leasehold Improvements)*
- Business Contents *(Machinery & Equipment, Furniture & Fixtures, and Other Business Assets, i.e. Inventory)*
- Economic Injury *(EIDL)*
- Military Reservist Economic Injury *(MREIDL)*

If you log out or close your browser now you will need to restart your application.

[Previous](#) [Next](#)

SBA.gov 3-Step Loan Process FEMA Disaster Assistance

Select your business type SBA Form 5 to be completed by:

- Corporations
- Partnership
- Private Non-Profits
- Limited Partnership
- Trust
- LLC

SBA Form 5C for: Sole Proprietorship

Once you make your selection the system will automatically direct you to the form.



# Select State /County / Disaster Declaration

SBA U.S. Small Business Administration

FAQs Help Contact Us My Account Logout

Loan Information Search Declarations Apply Online Message Center

## Disaster Loan Assistance

Federal Disaster Loans for Businesses, Private Nonprofits, Homeowners, and Renters

Disaster Loan Application Progress Save

### Declaration Selection

Please enter the State and County of the property damaged by the disaster.

\*State: Virginia \*County: Select a County...

If you log out or close your browser now you will need to restart your application.

Previous Next

SBA.gov 3-Step Loan Process FEMA Disaster Assistance

Use the drop-down box and select the State and County where the loss has happened

Select the disaster declaration

SBA U.S. Small Business Administration

FAQs Help Contact Us My Account Logout

Loan Information Search Declarations Apply Online Message Center

## Disaster Loan Assistance

Federal Disaster Loans for Businesses, Private Nonprofits, Homeowners, and Renters

Disaster Loan Application Progress Save

### Declaration Selection

Please enter the State and County of the property damaged by the disaster.

\*State: Virginia \*County: Fairfax

\* Select the Disaster that affected you.

| Select                           | Disaster Name                                | Disaster Description                         | State | Disaster Date | Filing Deadline |
|----------------------------------|----------------------------------------------|----------------------------------------------|-------|---------------|-----------------|
| <input type="radio"/>            | 2020 AGENCY DISASTER IN VIRGINIA GEO - 1.50  | 2020 AGENCY DISASTER IN VIRGINIA GEO - 1.50  | VA    | 1/30/2020     | 10/27/2020      |
| <input checked="" type="radio"/> | 2020 PRES IA DISASTER IN VIRGINIA GEO - 1.25 | 2020 PRES IA DISASTER IN VIRGINIA GEO - 1.25 | VA    | 1/28/2020     | 10/27/2020      |
| <input type="radio"/>            | ALICE DCMS 2.0 SF LV PRES IA DISATSER        | Alice DCMS 2.0 SF LV PRES IA Disaster        | VA    | 11/1/2019     | 8/10/2020       |
| <input type="radio"/>            | NEW DCMS 2.0 PRES IA                         | NEW DCMS 2.0 PRES IA DISASTER FOR TRN/OA     | VA    | 8/28/2019     | 5/27/2021       |

# Complete Certifications

 U.S. Small Business Administration

FAQs Help Contact Us My Account Logout

[Loan Information](#) [Search Declarations](#) [Apply Online](#) [Message Center](#)

## Disaster Loan Assistance

Federal Disaster Loans for Businesses, Private Nonprofits, Homeowners, and Renters

**Disaster Loan Application** Progress [Save](#)

### Certification as to Truthful Information

By certifying this application, you certify that all information in your application and submitted with your application is true and correct to the best of your knowledge, and that you will submit truthful information in the future.

**WARNING:** Whoever wrongfully misapplies the proceeds of an SBA disaster loan shall be civilly liable to the Administrator in an amount equal to one-and-one-half times the original principal amount of the loan under 15 U.S.C. 636(b). In addition, any false statement or misrepresentation to SBA may result in criminal, civil or administrative sanctions including, but not limited to: 1) fines and imprisonment, or both, under 15 U.S.C. 645, 18 U.S.C. 1001, 18 U.S.C. 1014, 18 U.S.C. 1040, 18 U.S.C. 3571, and any other applicable laws; 2) treble damages and civil penalties under the False Claims Act, 31 U.S.C. 3729; 3) double damages and civil penalties under the Program Fraud Civil Remedies Act, 31 U.S.C. 3802; and 4) suspension and/or debarment from all Federal procurement and non-procurement transactions. Statutory fines may increase if amended by the Federal Civil Penalties Inflation Adjustment Act Improvements Act of 2015

I Certify

If you log out or close your browser now you will need to restart your application.

[Previous](#) [Next](#)

SBA.gov 3-Step Loan Process FEMA Disaster Assistance

Read and Electronically Agree to the Certification of Truthful Information and the Executive Orders Document.

 U.S. Small Business Administration

FAQs Help Contact Us My Account Logout

[Loan Information](#) [Search Declarations](#) [Apply Online](#) [Message Center](#)

## Disaster Loan Assistance

Federal Disaster Loans for Businesses, Private Nonprofits, Homeowners, and Renters

**Disaster Loan Application** Progress

### STATEMENTS REQUIRED BY LAWS AND EXECUTIVE ORDERS

To comply with legislation passed by the Congress and Executive Orders issued by the President, Federal executive agencies, including the Small Business Administration (SBA), must notify you of certain information. You can find the regulations and policies implementing these laws and Executive Orders in Title 13, Code of Federal Regulations (CFR), Chapter 1, or our Standard Operating Procedures (SOPs). In order to provide the required notices, the following is a brief summary of the various laws and Executive Orders that affect SBA's Disaster Loan Programs. A glossary of terms can be found at [Disasterloan.sba.gov](#).

**FREEDOM OF INFORMATION ACT (5 U.S.C. § 552)**

This law provides, with some exceptions, that we must make records or portions of records contained in our files available to persons requesting them. This generally includes aggregate statistical information on our disaster loan programs and other information such as names of borrowers (and their officers, directors, stockholders or partners), loan amounts at maturity, the collateral pledged, and the general purpose of loans. We do not routinely make available to third parties your proprietary data without first notifying you, required by Executive Order 12600, or information that would cause competitive harm or constitute a clearly unwarranted invasion of personal privacy.

Freedom of Information Act (FOIA) requests must describe the specific records you want. For information about the FOIA, contact the Chief, FOI/AP Office, 409 3rd Street, SW, Suite 5900, Washington, DC 20416, or by email at [foia@sba.gov](mailto:foia@sba.gov).

**PRIVACY ACT (5 U.S.C. § 552a)**

Anyone can request to see or get copies of any personal information that we have in your file. Any personal information in your file that is retrieved by individual identifiers, such as name or social security number is protected by the Privacy Act, which means requests for information about you may be denied unless we have your written permission to release the information to the requestor or unless the information is subject to disclosure under the Freedom of Information Act. The Agreements and Certifications section of this form contains written permission for us to disclose the information resulting from this collection to state, local or private disaster relief services.

The Privacy Act authorizes SBA to make certain "routine uses" of information protected by that Act. One such routine use for SBA's loan system of records is that when this information indicates a violation or potential violation of law, whether civil, criminal, or administrative in nature, SBA may refer it to the appropriate agency, whether Federal, State, local or foreign, charged with responsibility for or otherwise involved in investigation, prosecution, enforcement or prevention of such violations. Another routine use of personal information is to assist in obtaining credit bureau reports, on the Disaster Loan Applicants and guarantors for purposes of originating, servicing, and liquidating Disaster loans. See, 69 F.R. 58598, 58617 (and as amended from time to time) for additional background and other routine uses.

Under the provisions of the Privacy Act, you are not required to provide social security numbers. (But see the information under Debt Collection Act below) We use social security numbers to distinguish between people with a similar or the same name for credit decisions and for debt collection purposes. Failure to provide this number may not affect any right, benefit or privilege to which you are entitled by law, but having the number makes it easier for us to more accurately identify to whom adverse credit information applies and to keep accurate loan records.

Note: Any person concerned with the collection, use and disclosure of information, under the Privacy Act may contact the Chief, FOI/PA Office, 409 3rd Street, SW, Suite 5900, Washington, DC 20416 or by e-mail at [foia@sba.gov](mailto:foia@sba.gov) for information about the Agency's procedures relating to the Privacy Act and the Freedom of Information Act.

**DEBT COLLECTION ACT OF 1982; DEFICIT REDUCTION ACT OF 1984; DEBT COLLECTION IMPROVEMENT ACT OF 1996 & other titles (31 U.S.C. 3701 et seq.)**

These laws require us to aggressively collect any delinquent loan payments and to require you to give your taxpayer identification number to us when you apply for a loan. If you receive a loan and do not make payments when they become due, we may take one or more of the following actions (this list may not be exhaustive):

- \*Report the delinquency to credit reporting bureaus.
- \*Offset your income tax refunds or other amounts due to you from the Federal Government.
- \*Refer the account to a private collection agency or other agency operating a debt collection center.
- \*Suspend or debar you from doing business with the Federal Government.
- \*Refer your loan to the Department of Justice.
- \*Foreclose on collateral or take other actions permitted in the loan instruments.

I have read the Statements Required by Laws and Executive Orders. [Print](#)

If you log out or close your browser now you will need to restart your application.

[Previous](#) [Next](#)

OMB Control No. 3245-0017  
Exp. 08/31/2021

# Completing The Form 5 App.

*For all EXCEPT Sole Proprietors*

- *Including:*
  - *Personal Financial Statement*
  - *Statement of Liabilities*
  - *IRS 4506T form*
  - *Taxes*

# Start Application – Form 5 (or 5C)

 [FAQs](#) [Help](#) [Contact Us](#) [My Account](#) [Logout](#) 

[Loan Information](#) [Search Declarations](#) [Apply Online](#) [Message Center](#)

## Disaster Loan Assistance

Federal Disaster Loans for Businesses, Private Nonprofits, Homeowners, and Renters

**Disaster Loan Application #2000003701 Progress**

### Filing Requirements

The following sections are required for all loan applications. A green check mark indicates that a section has been completed. Alternate [document delivery options](#) are available if needed.

|                                                                                                                                                     |                                             |
|-----------------------------------------------------------------------------------------------------------------------------------------------------|---------------------------------------------|
| Complete the <b>Disaster Business Loan Application</b> (SBA Form 5).                                                                                | <a href="#">Start</a>                       |
| Complete, sign and date each <b>Personal Financial Statement</b> (SBA Form 413) shown below.                                                        | <i>Complete preceding section(s) first.</i> |
| Complete each <b>Schedule of Liabilities</b> (SBA Form 2202) shown below.                                                                           | <i>Complete preceding section(s) first.</i> |
| Complete each <b>Request for Transcript of Tax Return</b> (IRS Form 4506-T) shown below.                                                            | <i>Complete preceding section(s) first.</i> |
| Complete copies, including all schedules, of the most recent Federal income tax returns for the applicant business; an explanation if not available | <i>Complete preceding section(s) first.</i> |
| Read and accept the Truthful Information Certification.                                                                                             | <i>Complete preceding section(s) first.</i> |
| Submit Application and Supporting Documents.                                                                                                        | <i>Complete preceding section(s) first.</i> |

**ADDITIONAL INFORMATION MAY BE NECESSARY TO PROCESS YOUR APPLICATION. IF REQUESTED, PLEASE PROVIDE WITHIN 7 DAYS OF THE INFORMATION REQUEST.**

Complete copy, including all schedules, of the most recent Federal income tax return for each principal owning 20 percent or more, each general partner or managing member, and each affiliate when any owner has more than a 50 percent ownership in the affiliate business. Affiliates include, but are not limited to, business parents, subsidiaries, and/or other businesses with common ownership or management

If the most recent Federal income tax return has not been filed, a year-end profit-and-loss statement and balance sheet for that tax year

A current year-to-date profit-and-loss statement

Additional Filing Requirements (SBA Form 1368) providing monthly sales figures form will generally be required when requesting an increase in the amount of economic injury.

[Previous](#)

OMB Control No. 3245-0017  
Exp. 08/31/2021

This business type for this example is an LLC.

This page provides information on all the filing requirements necessary to have a successfully completed application.

# Form 5 – Page 1

Do not complete. Items with a red \* are mandatory. You must complete before advancing.

Save

**SBA Form 5 - Page 1 of 3**

If you know your 9 digit FEMA Registration Number, please enter it here:

**1 ARE YOU APPLYING FOR:**

Physical Damage -- Indicate type of damage

Real Property       Business Contents

Economic Injury (EIDL)

Military Reservist EIDL (MREIDL)

Name of Essential Employee

Employee's Social Security Number

**2 ORGANIZATION TYPE \*Sole Proprietors should complete form 5C**

Partnership       Limited Partnership       Limited Liability Entity       Other

Corporation       Nonprofit Organization       Trust

**3 \*APPLICANT'S LEGAL NAME**      **4 \*Tax Identification Number (including dashes)**

CHADWICK G. NELSON      415-31-1234

**5 TRADE NAME (if different from legal name)**      **6 \*BUSINESS PHONE NUMBER (including area code)**

CHADWICK'S VACATION RENTALS CVR      817-845-3369

**7 MAILING ADDRESS**

Business       Home       Temporary       Other

**\*Number, Street, and/or Post Office Box**      **\*Zip**      **\*City**      **\*State**      **County**

123 MAIN      20170      HERNDON      VA      Fairfax

**8 DAMAGED PROPERTY ADDRESS(ES)**

**\*BUSINESS PROPERTY IS:**  Owned       Leased

Make this Address the same as Applicant's Mailing Address entered in Section 7

**\*Number and Street Name**      **\*Zip**      **\*City**      **\*State**      **\*County**

123 MAIN      20170      HERNDON      VA      Fairfax

Coverage Type:  Hazard      Insurance Company:  Allstate      Agent Name:  Tim Brogan

Phone Number of Insurance Agent:  703-774-1900      Policy Number:  MXU123-JKL

[Add Another Insurance](#)

[Add Another Damaged Property](#)

**9 PROVIDE THE NAME(S) OF THE INDIVIDUAL(S) TO CONTACT FOR:**

| Loss Verification Inspection |              | Information necessary to process the Application |              |
|------------------------------|--------------|--------------------------------------------------|--------------|
| <b>*Name</b>                 | CHAD NELSON  | <b>*Name</b>                                     | CHAD NELSON  |
| <b>*Telephone Number</b>     | 817-845-3369 | <b>*Telephone Number</b>                         | 817-845-3369 |

**10 ALTERNATE WAY TO CONTACT YOU**

Cell Number       E-mail

Fax Number       Other

**11 BUSINESS ACTIVITY:**  VACATION RENTALS      **12 NUMBER OF EMPLOYEES: (Pre-disaster)**  4

**13 \* DATE BUSINESS ESTABLISHED:**  01/01/2008      **14 \* CURRENT MANAGEMENT SINCE**  01/01/2008

**15 AMOUNT OF ESTIMATED LOSS:**

Real Estate       Inventory

Machinery & Equipment       Leasehold Improvements

**16 \*Do you own more than 50% or are you a Managing Member or General Partner of a corporation, partnership, limited partnership, or LLC?**       Yes       No

Previous      Next

OMB Control No. 3245-0017  
Exp. 08/31/2021

# Form 5 – Pages 2 and 3

Page 2; enter information about Partners or Affiliate Businesses.

Note: If a business is a partnership list all members with % of ownership; must equal 100%

Disaster Loan Application #200003701 Progress

SBA Form 5 - Page 2 of 3

17 OWNERS (individual and business) Complete for each: 1) proprietor, or 2) limited partner who owns 20% or more interest and each general partner, or 3) stockholder or entity owning 20% or more voting stock. Exclude Citizen NO answers in #22 on last page.

Individual Owner  No Individual Owner Individual Owner(s) required when SSN is used in Section 4

Individual Owner #1 delete

\*First Name: CHADWICK Middle Name: N Last Name: NELSON Suffix: Partner Title/Office: Partner % Owned: 85 E-Mail Address: [ ]

\*SSN: 415-31-1234 Marital Status: Not Married Date of Birth: 12/15/1985 Place of Birth: Vegas Telephone Number: [ ] U.S. Citizen?  Yes  No

\*Mailing Address: 123 MAIN Zip Code: 20210 City: WASHINGTON State: VA

\*In addition to ownership in CHADWICK G. NELSON, does this individual owner own more than 50% of, or is this individual owner a Managing Member or General Partner of a corporation, partnership, limited partnership, or LLC?  Yes  No

Individual Owner #2 delete

\*First Name: CRAIG Middle Name: N Last Name: BLACKLEY Suffix: Partner Title/Office: Partner % Owned: 15 E-Mail Address: [ ]

\*SSN: 555-12-1212 Marital Status: Married Date of Birth: 01/02/1967 Place of Birth: [ ] Telephone Number: [ ] U.S. Citizen?  Yes  No

\*Mailing Address: 456 PINE ST Zip Code: 30202 City: ATLANTA State: GA

\*In addition to ownership in CHADWICK G. NELSON, does this individual owner own more than 50% of, or is this individual owner a Managing Member or General Partner of a corporation, partnership, limited partnership, or LLC?  Yes  No

[Add Another Individual Owner](#)

Business Entity Owner  No Business Entity Owner Prohibited when SSN is used in Section 4

Intentionally left blank

No Business Entity Owner(s)

18 For the applicant business and each owner listed in item 17, please respond to the following questions, providing dates and details on any question answered YES.

a. Has the business or listed owner ever been involved in a bankruptcy or insolvency proceeding?  Yes  No

b. Does the business or a listed owner have any outstanding judgments, tax liens, or pending lawsuits against them?  Yes  No

c. In the past year, has the business or a listed owner been convicted of a criminal offense committed during and in connection with a riot or civil disorder or other declared disaster, or ever been engaged in the production or distribution of any product or service that has been determined to be obscene by a court of competent jurisdiction?  Yes  No

d. Has the business or a listed owner ever had or guaranteed a Federal loan or a Federally guaranteed loan?  Yes  No

e. Is the business or a listed owner delinquent on any Federal taxes, direct or guaranteed Federal loans (SBA, FHA, VA, student, etc.), Federal contracts, Federal grants, or any child support payments?  Yes  No

f. Does any owner, owner's spouse, or household member work for SBA or serve as a member of SBA's SCORE, ACE, or Advisory Council?  Yes  No

g. Is the applicant/to-applicant currently suspended or debarred from contracting with the Federal government or receiving Federal grants or loans?  Yes  No

19 Regarding you or any joint applicant listed in item 17:

a) are you presently subject to an indictment, criminal information, arraignment, or other means by which formal criminal charges are brought in any jurisdiction; b) have you been arrested in the past six months for any criminal offense; c) for any criminal offense - other than a minor vehicle violation - have you ever: 1) been convicted, 2) pled guilty, 3) plead not guilty, 4) been placed on pretrial diversion; or 5) been placed on any form of parole or probation (including probation before judgment)?  Yes  No

20 PHYSICAL DAMAGE LOANS ONLY

If your application is approved, you may be eligible for additional funds to cover the cost of mitigating measures (real property improvements or devices to minimize or protect against future damage from the same type of disaster event). It is not necessary for you to submit the description and cost estimates with the application. SBA must approve the mitigating measures before any loan increase.

By checking this box, I am interested in having SBA consider this increase.

21 If anyone assisted you in completing this application, whether you pay a fee for this service or not, that person must print and sign their name in the space below.

Name and Address of representative (please include the individual name and their company)

(Print Individual Name) [ ]

(Name of Company) [ ] Phone number (including Area Code) [ ]

Street Address [ ] City [ ] State [ ] Zip Code [ ] Fee Charged or Agreed Upon [ ]

Unless the NO box is checked, I give permission for SBA to discuss any portion of this application with the representative listed above.

No

AGREEMENTS AND CERTIFICATIONS

On behalf of the undersigned individually and for the applicant business:

I/We authorize my/our insurance company, bank, financial institution, or other creditor to release to SBA all records and information necessary to process this application.

If my/our loan is approved, additional information may be required prior to loan closing. I/We will be advised in writing what information will be required to obtain my/our loan funds.

I/We hereby authorize the SBA to verify my/our asset and resource information and safety history as needed to process and service a disaster loan.

SBA U.S. Small Business Administration

Disaster Loan Assistance

Federal Disaster Loans for Businesses, Private Nonprofits, Homeowners, and Renters

Disaster Loan Application #200003701 Progress

SBA Form 5 - Page 3 of 3

22 ADDITIONAL SPACE

Please refer to Item Number and Title

400 characters remaining

Previous Next

SBA.gov 3-Step Loan Process FEMA Disaster Assistance

Page 3 is used for any relevant comments

# Filing Requirements

Application is complete – now upload requirements on this page to complete the process.

## Filing Requirements

The following sections are required for all loan applications. A green check mark indicates that a section has been completed. Alternate [document delivery options](#) are available if needed.

Complete the **Disaster Business Loan Application** (SBA Form 5).

✓ **Disaster Business Loan Application**

Update

Complete, sign and date each **Personal Financial Statement** (SBA Form 413) shown below.

CHADWICK R NELSON

Start

CRAIG BLACKLEY

Start

Complete each **Schedule of Liabilities** (SBA Form 2202) shown below.

CHADWICK G. NELSON

Start

Complete each **Request for Transcript of Tax Return** (IRS Form 4506-T) shown below.

CHADWICK G. NELSON

Start

CHADWICK R NELSON

Start

CRAIG BLACKLEY

Start

Complete copies, including all schedules, of the most recent Federal income tax returns for the applicant business; an explanation if not available

CHADWICK G. NELSON

Start

Read and accept the Truthful Information Certification.

**Truthful Information Certification**

*Complete preceding section(s) first.*

Submit Application and Supporting Documents.

**Submit Application**

*Complete preceding section(s) first.*

# Personal Financial Statement

Complete, sign and date each *Personal Financial Statement (SBA Form 413)* shown below.

CHADWICK R NELSON

Start

CRAIG BLACKLEY

Start

Complete your personal financial statement

If you indicated you have real estate you must complete this form, supplying additional information

## Disaster Loan Assistance

Federal Disaster Loans for Businesses, Private Nonprofits, Homeowners, and Renters

Disaster Loan Application #2000003701 Progress

Save

### Personal Income

Please provide the sources of personal income of CHADWICK R NELSON.

If you are unable to enter data for this Personal Financial Statement now, click [here](#) to download a paper copy to submit offline.

Income amounts should be based on annual whole dollar figures.

As of  (MM/DD/YYYY)

|                       |                                          |                    |                                           |
|-----------------------|------------------------------------------|--------------------|-------------------------------------------|
| Salary                | <input type="text" value="\$45,000.00"/> | Real Estate Income | <input type="text" value="\$175,000.00"/> |
| Net Investment Income | <input type="text"/>                     | Other Income       | <input type="text"/>                      |

Description of Other Income (example - Alimony, Child Support, Disability, Pension, Social Security, etc.)  
240 characters remaining

1 - Alimony or child support payments need not be disclosed in "Other Income" unless it is desired to have such payments counted toward total income.

Previous

Next

OMB Control No. 3245-0188  
Exp. 01/31/2018

Disaster Loan Application #2000003701 Progress

Save

### Personal Real Estate Owned

Please provide the information for real estate owned by CHADWICK R NELSON. List each parcel separately.

- Click "Add Another" to enter a new property
- Scroll buttons below the real estate section can be used to move between pages of real estate.
- To remove a property, click the red X next to that property.

I do not own real estate

| Real Estate Owned                 | Property 1                                     |
|-----------------------------------|------------------------------------------------|
| Type of Property                  | <input type="text" value="Investment"/>        |
| Address                           | <input type="text" value="125 SIDNEY"/>        |
| City, State, Zip Code             | <input type="text" value="ATLANTA, GA 30303"/> |
| Date Purchased (MM/YYYY)          | <input type="text" value="12/2018"/>           |
| Original Cost                     | <input type="text" value="\$145,000.00"/>      |
| Present Market Value <sup>1</sup> | <input type="text" value="\$450,000.00"/>      |
| Name of Mortgage Holder           | <input type="text"/>                           |
| Street Address / PO Box           | <input type="text"/>                           |
| City, State, Zip Code             | <input type="text"/>                           |
| Mortgage Account Number           | <input type="text"/>                           |
| Mortgage Balance <sup>2</sup>     | <input type="text"/>                           |
| Amount of Payment per Mo/Yr       | <input type="text"/> <input type="text"/>      |
| Status of Mortgage                | <input type="text"/>                           |

Page 1 of 1

1 - Market Value(s) will be totaled and displayed on the Personal Assets page.  
2 - Mortgage Balance(s) will be totaled and displayed on the Personal Debts page.

Previous

Next



# Personal Assets / Debts

List all assets and debts for applicants applicant

Disaster Loan Application #2000003701 Progress Save

### Personal Assets

Please provide the personal assets for CHADWICK R. NELSON.

- Click "Add Another" to enter a new Security (Stocks and Bonds).
- To remove a Security, click the red X next to the Security (Stocks and Bonds).

**Stocks and Bonds**

| Delete | Number of Shares     | Name of Securities   | Cost                 | Market Value Quotation/Exchange | Date of Quotation/Exchange | Total Value |
|--------|----------------------|----------------------|----------------------|---------------------------------|----------------------------|-------------|
| X      | <input type="text"/> | <input type="text"/> | <input type="text"/> | <input type="text"/>            | <input type="text"/>       | \$0.00      |

Add Another Total Value of Stocks & Bonds: \$0.00  
Total Value for All Stocks and Bonds will display in Assets section below.

**Assets**

|                                                             |                                             |                                               |                                           |
|-------------------------------------------------------------|---------------------------------------------|-----------------------------------------------|-------------------------------------------|
| Cash on Hand & in Banks                                     | <input type="text" value="\$35,000.00"/>    | Stocks & Bonds                                | <input type="text" value="\$0.00"/>       |
| Savings Accounts                                            | <input type="text" value="\$45,000.00"/>    | (Total from Stocks and Bonds Section)         |                                           |
| IRA or Other Retirement Account                             | <input type="text" value="\$1,000,564.00"/> | Real Estate                                   | <input type="text" value="\$450,000.00"/> |
| Accounts & Notes Receivable                                 | <input type="text"/>                        | (Total from Real Estate Section)              |                                           |
| Life Insurance - Cash Surrender Value Only (Describe below) | <input type="text"/>                        | Automobiles - Total Present Value             | <input type="text"/>                      |
|                                                             |                                             | (Describe below, and include Year/Make/Model) |                                           |
|                                                             |                                             | Other Personal Property                       | <input type="text"/>                      |
|                                                             |                                             | (Describe below)                              |                                           |
|                                                             |                                             | Other Assets                                  | <input type="text"/>                      |
|                                                             |                                             | (Describe below)                              |                                           |
| <b>Total Assets</b>                                         |                                             | <b>\$1,530,564.00</b>                         |                                           |

**Life Insurance Held**  
(Give face amount and cash surrender value of policies - name of insurance company and beneficiaries.)

240 characters remaining

**Other Personal Property and Other Assets**  
(Describe, and if any is pledged as security, state name and address of lien holder, amount of lien, terms of payment and if delinquent, describe delinquency.)

240 characters remaining

Previous Next

Disaster Loan Application #2000003701 Progress Save

### Personal Debts

Please provide the personal debts for CHADWICK R. NELSON.

- Click "Add Another" to enter a new Noteholder.
- To remove Noteholder, click the red X next to the Noteholder.

**Notes Payable to Banks & Others**

| Delete | Name and Address of Noteholder(s) | Original Balance     | Current Balance      | Payment Amount       | Frequency (monthly, etc.) | How Secured or Endorsed Type of Collateral |
|--------|-----------------------------------|----------------------|----------------------|----------------------|---------------------------|--------------------------------------------|
| X      | <input type="text"/>              | <input type="text"/> | <input type="text"/> | <input type="text"/> | <input type="text"/>      | <input type="text"/>                       |

Add Another Total of Current Balances: \$0.00  
Current Balances will display in the Debts Section below.

**Debts**

|                                                                       |                                         |                                                           |                                          |
|-----------------------------------------------------------------------|-----------------------------------------|-----------------------------------------------------------|------------------------------------------|
| Accounts Payable                                                      | <input type="text" value="\$4,500.00"/> | Loan on Life Insurance                                    | <input type="text"/>                     |
| Notes Payable to Banks & Others (total of Current Balance from above) | <input type="text" value="\$0.00"/>     | Mortgages on Real Estate (total from Real Estate Section) | <input type="text" value="\$0.00"/>      |
| Installment Account (Auto)                                            | <input type="text"/>                    | Unpaid Taxes (Describe below)                             | <input type="text"/>                     |
| Monthly Payment                                                       | <input type="text"/>                    | Other Liabilities (Describe below)                        | <input type="text" value="\$45,000.00"/> |
| Installment Account (Other)                                           | <input type="text"/>                    |                                                           |                                          |
| Monthly Payment                                                       | <input type="text"/>                    |                                                           |                                          |
| <b>Total Debts</b>                                                    |                                         | <b>\$49,500.00</b>                                        |                                          |

**Unpaid Taxes**  
(Describe in detail, as to type, as to whom payable, when due, amount, and to what property, if any, a tax lien attached.)

240 characters remaining

**Other Debts**  
(Describe in detail.)

240 characters remaining

**Contingent Liabilities**

|                          |                      |                                  |                      |
|--------------------------|----------------------|----------------------------------|----------------------|
| As Endorser or Co-Maker  | <input type="text"/> | Provision for Federal Income Tax | <input type="text"/> |
| Legal Claims & Judgments | <input type="text"/> | Other Special Debt               | <input type="text"/> |

Previous Next

# Schedule of Liabilities – SBA form 2202

Complete each *Schedule of Liabilities* (SBA Form 2202) shown below.

CHADWICK G. NELSON

Start

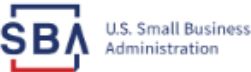

FAQs Help Contact Us My Account Logout

Loan Information Search Declarations Apply Online Message Center

## Disaster Loan Assistance

Federal Disaster Loans for Businesses, Private Nonprofits, Homeowners, and Renters

Disaster Loan Application #2000003701 Progress

Save

### Schedule of Liabilities - (Notes, Mortgages and Accounts Payable)

This form is provided for your convenience in responding to filing requirements in Item 2 on the application, SBA Form 5. You may use your own form if you prefer. The information contained in this schedule is a supplement to your balance sheet and should balance to the liabilities presented on that form.

If you are unable to enter data for the Schedule of Liabilities now, click [here](#) to download a paper copy to submit offline.

Name: CHADWICK G. NELSON

Date of Schedule:

I have NO Debts

- Click "Add Another" to enter a new creditor.
- To remove a creditor, click the red X next to the creditor.

#### Schedule of Liabilities

| Delete | Name of Creditor     | Original Amount      | Original Date (MM/YYYY) | * Current Balance    | Current?                 | Maturity Date (MM/YYYY) | * Payment Amount     | * Month or Year      | How Secured          |
|--------|----------------------|----------------------|-------------------------|----------------------|--------------------------|-------------------------|----------------------|----------------------|----------------------|
| X      | <input type="text"/> | <input type="text"/> | <input type="text"/>    | <input type="text"/> | <input type="checkbox"/> | <input type="text"/>    | <input type="text"/> | <input type="text"/> | <input type="text"/> |

Add Another

Previous

Next

# Upload 4506T

Complete, sign and upload for each party. Save a copy.

**SBA** U.S. Small Business Administration

FAQs Help Contact Us My Account Logout

Loan Information Search Declarations Apply Online Message Center

## Disaster Loan Assistance

Federal Disaster Loans for Businesses, Private Nonprofits, Homeowners, and Renters

Disaster Loan Application #2000003701 Progress Save

### Request for Transcript of Tax Return

SBA requires you to complete the IRS Form 4506-T as a part of your disaster loan application submission. The form authorizes the IRS to provide federal income tax information directly to SBA. Please use this page to enter the additional data needed to populate IRS Form 4506-T.

- You must check the box in the signature area to acknowledge you have the authority to sign and request the information. The form will not be processed and returned to you if the box is unchecked.

Name shown on tax return. If a joint return, the name shown first. **First SSN, individual taxpayer identification number, or employer identification number**

CHADWICK R NELSON 415-31-1234

Current address (including apt., room, or suite no.), city, state, and ZIP code

123 MAIN, HERNDON, VA 20170

Previous address shown on the last return filed if different from current address

| Address Line 1 | Address Line 2 | City | State | Zip Code |
|----------------|----------------|------|-------|----------|
|                |                |      |       |          |

Tax Form Number(s) Year or period requested

1040 2018, 2017, 2016

**Signature of taxpayer(s).**

I declare that I am either the taxpayer whose name is shown on line 1a or 2a, or a person authorized to obtain the tax information requested. If the request applies to a joint return, at least one spouse must sign. If signed by a corporate officer, 1 percent or more shareholder, partner, managing member, guardian, tax matters partner, executor, receiver, administrator, trustee, or party other than the taxpayer, I certify that I have the authority to execute Form 4506-T on behalf of the taxpayer.

**NOTE:** For transcripts being sent to a third party, this form must be received within 120 days of the signature date.

Signatory attests that he/she has read the attestation clause and upon so reading declares that he/she has the authority to sign the Form 4506-T.

Previous Next

OMB Control No. 1545-1872

## Disaster Loan Assistance

Federal Disaster Loans for Businesses, Private Nonprofits, Homeowners, and Renters

Disaster Loan Application #2000003701 Progress Save

### Request for Transcript of Tax Return - Download / Upload

- Download the completed Request for Transcript Of Tax Return for CHADWICK R NELSON

The data collection for **your** Request for Transcript of Tax Return (IRS Form 4506-T) is complete. Click the download button below to save **your** document.

Download

- Sign and date the document.

Once downloaded and printed, be sure to **sign** and **date** the document.

- Include the signed document with your application.

Scan and attach your signed Request for Transcript of Tax Return (IRS Form 4506-T).

File Name Browse ... Upload

Attached file must be an unprotected file in PDF format less than 38MB.

OR

If you are unable to attach a signed copy of the printed document, you may skip this step and submit it offline by other methods outlined in the [document delivery options](#) page.

The signed paper document must be received by the SBA before processing of your application can begin.

I agree to deliver a copy of the completed document to the SBA.

Previous Next

# 4506T Uploaded Successful

Complete each **Request for Transcript of Tax Return** (IRS Form 4506-T) shown below.

✓ CHADWICK G. NELSON

Document attached

✓ CHADWICK R NELSON

Document attached

✓ CRAIG BLACKLEY

Document attached



FAQs Help Contact Us My Account Logout 

[Loan Information](#) [Search Declarations](#) [Apply Online](#) [Message Center](#)

## Disaster Loan Assistance

Federal Disaster Loans for Businesses, Private Nonprofits, Homeowners, and Renters

Disaster Loan Application #2000003701 Progress

### Request for Transcript of Tax Return - Download / Upload

- **Download the completed Request for Transcript Of Tax Return for CHADWICK G. NELSON**

The data collection for **your** Request for Transcript of Tax Return (IRS Form 4506-T) is complete. Click the download button below to save **your** document.
- **Sign and date the document.**

Once downloaded and printed, be sure to **sign** and **date** the document.
- **Include the signed document with your application.**

**Your document has been successfully uploaded.**

The file **4506 T.pdf** has been associated with your application. [Remove](#) this file to replace it.

Click the Next button to continue.

SBA.gov 3-Step Loan Process FEMA Disaster Assistance

This confirms the 4506 T forms were uploaded successfully

# Tax Returns

Your most recent tax returns are needed

Complete copies, including all schedules, of the most recent Federal income tax returns for the applicant business; an explanation if not available

CHADWICK G. NELSON

Start

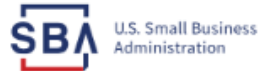

[FAQs](#) [Help](#) [Contact Us](#) [My Account](#) [Logout](#)

[Loan Information](#) [Search Declarations](#) [Apply Online](#) [Message Center](#)

## Disaster Loan Assistance

Federal Disaster Loans for Businesses, Private Nonprofits, Homeowners, and Renters

Disaster Loan Application #2000003701 Progress

Save

### Federal Tax Return - Upload

- Include the document with your application.

Scan and attach the Federal Tax Return for the Applicant Business.

File Name

Browse ...

Upload

Attached file must be an unprotected file in PDF format less than 38MB.

OR

If you are unable to attach a completed copy of the document, you may skip this step and submit it offline by other methods outlined in the [document delivery options](#) page.

The document must be received by the SBA before processing of your application can begin.

I agree to deliver a copy of the completed document to the SBA.

Previous

Next

# Certificate as to Truthful Information

Read and accept the Truthful Information Certification.

**Truthful Information Certification**

**Start**

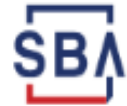

U.S. Small Business  
Administration

[FAQs](#) [Help](#) [Contact Us](#) [My Account](#) [Logout](#)

[Loan Information](#) [Search Declarations](#) [Apply Online](#) [Message Center](#)

## Disaster Loan Assistance

Federal Disaster Loans for Businesses, Private Nonprofits, Homeowners, and Renters

Disaster Loan Application #2000003701 Progress

**Save**

### Certification as to Truthful Information

By certifying this application, you certify that all information in your application and submitted with your application is true and correct to the best of your knowledge, and that you will submit truthful information in the future.

**WARNING:** Whoever wrongfully misapplies the proceeds of an SBA disaster loan shall be civilly liable to the Administrator in an amount equal to one-and-one half times the original principal amount of the loan under 15 U.S.C. 636(b). In addition, any false statement or misrepresentation to SBA may result in criminal, civil or administrative sanctions including, but not limited to: 1) fines and imprisonment, or both, under 15 U.S.C. 645, 18 U.S.C. 1001, 18 U.S.C. 1014, 18 U.S.C. 1040, 18 U.S.C. 3571, and any other applicable laws; 2) treble damages and civil penalties under the False Claims Act, 31 U.S.C. 3729; 3) double damages and civil penalties under the Program Fraud Civil Remedies Act, 31 U.S.C. 3802; and 4) suspension and/or debarment from all Federal procurement and non-procurement transactions. Statutory fines may increase if amended by the Federal Civil Penalties Inflation Adjustment Act Improvements Act of 2015

\*  I Certify

**Previous**

**Next**

# Filing Requirements Complete

Example left shows items to be 'started'. Example right shows after they are complete (they say 'Update').  
The application is now ready to submit

**Disaster Loan Application #2000003701 Progress**

### Filing Requirements

The following sections are required for all loan applications. A green check mark indicates that a section has been completed. Alternate [document delivery options](#) are available if needed.

Complete the **Disaster Business Loan Application** (SBA Form 5).

✓ **Disaster Business Loan Application**

Complete, sign and date each **Personal Financial Statement** (SBA Form 413) shown below.

**CHADWICK R NELSON**

**CRAIG BLACKLEY**

Complete each **Schedule of Liabilities** (SBA Form 2202) shown below.

**CHADWICK G. NELSON**

Complete each **Request for Transcript of Tax Return** (IRS Form 4506-T) shown below.

**CHADWICK G. NELSON**

**CHADWICK R NELSON**

**CRAIG BLACKLEY**

Complete copies, including all schedules, of the most recent Federal income tax returns for the applicant business; an explanation if not available

**CHADWICK G. NELSON**

Read and accept the Truthful Information Certification.

**Truthful Information Certification** Complete preceding section(s) first.

Submit Application and Supporting Documents.

**Submit Application** Complete preceding section(s) first.

**Disaster Loan Application #2000003701 Progress**

### Filing Requirements

The following sections are required for all loan applications. A green check mark indicates that a section has been completed. Alternate [document delivery options](#) are available if needed.

Complete the **Disaster Business Loan Application** (SBA Form 5).

✓ **Disaster Business Loan Application**

Complete, sign and date each **Personal Financial Statement** (SBA Form 413) shown below.

✓ **CHADWICK R NELSON**

✓ **CRAIG BLACKLEY**

Complete each **Schedule of Liabilities** (SBA Form 2202) shown below.

✓ **CHADWICK G. NELSON**

Complete each **Request for Transcript of Tax Return** (IRS Form 4506-T) shown below.

✓ **CHADWICK G. NELSON** Document attached

✓ **CHADWICK R NELSON** Document attached

✓ **CRAIG BLACKLEY** Document attached

Complete copies, including all schedules, of the most recent Federal income tax returns for the applicant business; an explanation if not available

✓ **CHADWICK G. NELSON** Document attached

Read and accept the Truthful Information Certification.

✓ **Truthful Information Certification**

Submit Application and Supporting Documents.

**Preview Electronic Loan Application**

**Submit Application**

# Application Successfully Submitted

After application is successfully submitted this page shows a message indicator, which confirms submittal of the application

The screenshot shows the SBA U.S. Small Business Administration website. The main heading is "Disaster Loan Assistance" with the subtitle "Federal Disaster Loans for Businesses, Private Nonprofits, Homeowners, and Renters". A progress bar indicates "Disaster Loan Application #2000003701 Progress". The section is titled "Application Submission Confirmation" and contains the following text: "Application number 2000003701 has been submitted.", "Please download and retain [your submitted document\(s\)](#) for your records.", "Click [here](#) to return to your home page.", and "If you are finished, you can [log out of the application](#). Logging out of the application will clear your activity from your browser's memory. This is especially important if you use a shared or public computer." A red circle highlights the "Message Center" link in the top navigation bar, which has a red notification badge with the number "1".

The screenshot shows the "Message Center" section of the SBA website. It includes the same header and navigation as the previous screenshot. The "Message Center" heading is followed by the instruction: "Click on any message to view the contents. Clicking the Delete link will delete the message immediately." Below this is a table with the following data:

| Subject                                              | Received              |                        |
|------------------------------------------------------|-----------------------|------------------------|
| SBA Application No. 2000003701 - Submit Confirmation | 3/15/2020 11:09:29 AM | <a href="#">Delete</a> |

At the bottom of the message center, there is a button labeled "« Home Page".



# Completing The Form 5C App.

*ONLY for Sole Proprietors*

- *Including:*
  - *Personal Financial Statement*
  - *Statement of Liabilities*
  - *IRS 4506T form*
  - *Taxes*

# Completing Form 5C - Sole Proprietor Loan Application

Fields marked with a red asterisk are required.

Disaster Loan Application #2000003704 Progress:  Save

## Primary Applicant Information

### INFORMATION ABOUT THE APPLICANT

Copy User Registration Information

\*First Name

Middle Name

\*Last Name

Suffix  \*Date of Birth

\*Social Security Number

\*Marital Status  Married  Not Married

\*Are you a U.S. Citizen?  Yes  No

\*Are you an SBA Employee?  Yes  No

\*Household Size

\*Do you own more than 50% or are you a Managing Member or General Partner of a corporation, partnership, limited partnership, or LLC?  Yes  No

### CONTACT INFORMATION

\*Check your preferred method of contact:

E-mail Address

Cell Phone

Home Phone

Work Phone

Closest Relative Not Living with You:

Name

Phone Number

### MAILING ADDRESS

\*Address

\*Zip  \*City  \*State  County

### INCOME INFORMATION

Employed  Unemployed  Self Employed  Retired

\*Employer Name

\*Total Annual Income (before deductions)  \*Employer Phone Number

**Note:** Include all recurring income from all sources such as employment, self-employment, part-time work, social security, retirement income, disability income, interest income, child support, alimony, etc.  
Do not include one-time or non-recurring income.

# Form 5C continued - Damaged Property Information

Disaster Loan Application #2000003700

Progress: 

[Save](#)

## Damaged Property Information

• At least one of the following fields are required: Real Estate, Personal Property, Automobile

### DAMAGED PROPERTY ADDRESS

[Same as primary applicant mailing address](#)

\*Address

\*Zip  \*City  \*State  \*County

\*Type of Damage:  Real Estate  Personal Property  Automobile

### DAMAGED PROPERTY INFORMATION

\*Do you own or rent this property?  Own  Rent

\*Is this property your Primary Residence?  Yes  No

\*If No, please select from the list below:

Vacation/secondary home  I own the property but a family member/friend lives in the property  Rental/Business Property

### INSURANCE INFORMATION

Please check all insurance in force for the damaged property:

Homeowner's  Flood  Automobile  Renter's  No Insurance  Other:  (describe)

| *Policy Type                             | *Insurance Company Name               | Policy Number                             | Phone Number                              | Amount Received                     |                        |
|------------------------------------------|---------------------------------------|-------------------------------------------|-------------------------------------------|-------------------------------------|------------------------|
| <input type="text" value="Homeowner's"/> | <input type="text" value="True INS"/> | <input type="text" value="000099991111"/> | <input type="text" value="222-333-4444"/> | <input type="text" value="\$0.00"/> | <a href="#">delete</a> |

[Add Insurance](#)

[Previous](#)

[Next](#)

# Form 5C continued -Debts and Assets Information

Disaster Loan Application #2000003700

Progress: 

[Save](#)

## Debts and Assets Information

**DEBTS**  I have no debts

**Mortgage Holder or Landlord's Name (Primary Residence)**

| Name       | Monthly Payment/Rent | Current Balance |
|------------|----------------------|-----------------|
| Mortgage 1 | \$1,000.00           | \$60,000.00     |

**2nd Mortgage Holder Name (if applicable)**

| Name | Monthly Payment/Rent | Current Balance |
|------|----------------------|-----------------|
| Name | Monthly Payment/Rent | Current Balance |

Note: Please complete the section below if the amounts are NOT included in your mortgage payment:

| Real Estate Taxes (per year) | Homeowner's Insurance (per year) | Condo/Townhome/HOA/Co-Op Fees (per year) |
|------------------------------|----------------------------------|------------------------------------------|
| \$2,500.00                   | \$1,000.00                       | \$250.00                                 |

**Other Debt** including auto payments, credit cards, installment loans, student loans, etc. **Note: Only include debts that will last longer than 10 months.**

| *Name of Creditor        | *Monthly Payment | Current Balance |
|--------------------------|------------------|-----------------|
| <a href="#">Add Debt</a> |                  |                 |

## ASSETS

**Pre-disaster values:**

|                                                                                                                    |                                                    |
|--------------------------------------------------------------------------------------------------------------------|----------------------------------------------------|
| *Cash, Bank Accounts and Marketable Securities (e.g. Stock & Bonds, CDs, etc.) (Not including retirement accounts) | \$95,000.00                                        |
| *Retirement Accounts (e.g. IRAs, Keogh, TSP or other similar accounts)                                             | \$20,000.00                                        |
| *Personal Property (furniture, appliances, vehicles, RVs, etc.)                                                    | \$35,000.00                                        |
| *Primary Residence                                                                                                 | \$250,000.00                                       |
| All Other Real Estate (describe) <input type="text"/>                                                              | Other Real Estate Description <input type="text"/> |
|                                                                                                                    | \$0.00                                             |

## OTHER DISASTER ASSISTANCE

**FEMA Registration Number**

\*Other than FEMA, have you received any grant award (i.e. city grants, county grants, state grants, etc.):  Yes  No

**State Amount**  **Other Amount**  **Describe**

[Previous](#)

[Next](#)

# Form 5C continued - Disclosure Statements

Disaster Loan Application #2000003704

Progress: 

Save

## Disclosure Statements

### DISCLOSURES

The responses below apply to the Applicant and Joint Applicant, if any. Please explain any "Yes" responses.

- \*1. Are you delinquent on any Federal taxes, Federal loans, Federal grants, or 60 days past due on any child support obligation?  Yes  No
- \*2. Are you currently a defendant in any lawsuits or have pending judgements against you?  Yes  No
- \*3. Are you currently suspended or debarred from contracting with Federal government or receiving Federal grants or loans?  Yes  No
- \*4. Do you have federal loans, federally guaranteed loans, or previous SBA loans?  Yes  No
- \*5. Are you engaged in the production or distribution of any product that has been determined to be obscene by a court of competent jurisdiction?  Yes  No
- \*6. In the past year, have you been convicted of a felony committed in connection with a riot or civil disorder?  Yes  No
- \*7. Are you presently, a) subject to an indictment, criminal information, arraignment, or other means by which formal criminal charges are brought in any jurisdiction; b) have you been arrested in the past six months for any criminal offense; c) for any criminal offense -other than a minor vehicle violation -- have you ever: 1) been convicted, 2) plead guilty, 3) plead nolo contendere, 4) been placed on pretrial diversion, or 5) been placed on any form of parole or probation (including probation before judgment)?  Yes  No

### BUSINESS ACTIVITY

| Business Activity                         | *Date Business Established              | Number of Employees (pre-disaster) |
|-------------------------------------------|-----------------------------------------|------------------------------------|
| <input type="text" value="JWJ Building"/> | <input type="text" value="01/01/2000"/> | <input type="text" value="5"/>     |

### REPRESENTATIVE INFORMATION

If you have paid a representative (packager, attorney, accountant, etc.) to assist you in completing the application, please complete the section below.

| Representative Name                              | Street Address                              | City                              | State                         | Zip                              | Fee charged or agreed upon                              |
|--------------------------------------------------|---------------------------------------------|-----------------------------------|-------------------------------|----------------------------------|---------------------------------------------------------|
| <input type="text" value="Representative Name"/> | <input type="text" value="Street Address"/> | <input type="text" value="City"/> | <input type="text" value=""/> | <input type="text" value="Zip"/> | <input type="text" value="Fee charged or agreed upon"/> |

Previous

Next

# Form 5C continued - Consent and Additional Comments

Read the information, check "All the information..." then click "Next".

Additional Comments are used for clarifying or additional information.

Click "Next" to continue the process.

Disaster Loan Application #2000003700 Progress:  Save

## Consent

### CONSENT

I authorize my insurance company, bank, financial institution, or other creditors to release to SBA all records and financial information necessary to process this application.

SBA has my permission, as required by the Privacy Act, to release any information collected in connection with this application to Federal, state, local, tribal or nonprofit organizations (e.g. Red Cross, Salvation Army, Mennonite Disaster Services, SBA Resource Partners) for the purpose of assisting me with my SBA application, evaluating my eligibility for additional disaster assistance, or notifying me of the availability of such assistance.

If my loan is approved, I may be eligible for additional funds to safeguard my property from damages similar to those caused by this disaster. Although it is not necessary for me to provide with my application, a description and cost estimate will be required prior to SBA approval of the mitigation measure.

I have received and read a copy of the "STATEMENTS REQUIRED BY LAWS AND EXECUTIVE ORDERS" which was attached to this application.

**CERTIFICATION AS TO TRUTHFUL INFORMATION:** By signing this application, you certify that all information in your application and submitted with your application is true and correct to the best of your knowledge, and that you will submit truthful information in the future.

**WARNING:** Whoever wrongfully misapplies the proceeds of an SBA disaster loan shall be civilly liable to the Administrator in an amount equal to one-and-one half times the original principal amount of the loan under 15 U.S.C. 636(b). In addition, any false statement or misrepresentation to SBA may result in criminal, civil or administrative sanctions including, but not limited to: 1) fines and imprisonment, or both, under 15 U.S.C. 645, 18 U.S.C. 1001, 18 U.S.C. 1014, 18 U.S.C. 1040, 18 U.S.C. 3571, and any other applicable laws; 2) treble damages and civil penalties under the False Claims Act, 31 U.S.C. 3729; 3) double damages and civil penalties under the Program Fraud Civil Remedies Act, 31 U.S.C. 3802; and 4) suspension and/or debarment from all Federal procurement and non-procurement transactions. Statutory fines may increase if amended by the Federal Civil Penalties Inflation Adjustment Act Improvements Act of 2015.

**All the information on this application and any documents provided is true to the best of my knowledge and you may rely on it to provide disaster loan assistance. All damages claimed are a direct result of the declared disaster. I understand that I could lose my benefits and could be prosecuted by the U.S. Attorney for making false statements. Reference 18 U.S.C. 1001 and / or 15 U.S.C. 645.**

Previous Next

OMB Control No. 3245-0018  
Exp. 08/31/2021

Disaster Loan Application #2000003700 Progress:  Save

## Additional Comments

### ADDITIONAL COMMENTS

4000 character(s) left.

Previous Next

OMB Control No. 3245-0018  
Exp. 08/31/2021

# Form 5C continued - Affiliated Businesses

Disaster Loan Application #2000003704 Progress 

## Affiliated Businesses

Please complete the affiliate information below for each applicant and/or owner that owns more than 50% of, or are a Managing Member or General Partner of a corporation, partnership, limited partnership, or LLC.

After you've entered the affiliated business information, click "Save" to add it to your list.

### Affiliated Businesses

#### \*Applicant or Owner Name for Affiliate Details

JOHN WESLEY JONES Jr. ▾

#### \*Business Name

JWJ BULDERS

#### \*EIN

89-9988888

#### \*Organization Type

LLC, LLP, OR LLE ▾

#### \*% Owned

100

#### Title

President ▾

#### \*Address Line 1

101 HOMETOWN ST

#### Address Line 2

#### \*Zip Code

20170

#### City

HERNDON ▾

#### \*State

VA

#### County

FAIRFAX ▾

Cancel

Save

The names listed below are the applicants or owners that answered YES to "Do you own more than 50% or are you a Managing Member or General Partner of a corporation, partnership, limited partnership, or LLC?" If the answer was entered incorrectly for any applicant or owner, click the "Remove" button to change the answer to NO and remove them from this list.

Remove

JOHN WESLEY JONES Jr.

Affiliate Name

EIN

Type

% Owned

*Please enter affiliated business information for JOHN WESLEY JONES Jr..*

Previous

Next

Fill out the Affiliated Business information then click "Save".

# Completing IRS Form 4506-T

## Filing Requirements

The following sections are required for all loan applications. A green check mark indicates that a section has been completed. Alternate [document delivery options](#) are available if needed.

Complete the **Disaster Home / Sole Proprietor Loan Application** (SBA Form 5C).

 **Disaster Home / Sole Proprietor Loan Application**

Update

Complete and sign each **Request for Transcript of Tax Return** (IRS Form 4506-T) shown below. This income information, obtained from the IRS, will help us determine your repayment ability.

JOHN WESLEY JONES Jr.

Start

JWJ BULDERS

Start

Read and accept the Truthful Information Certification.

Truthful Information Certification

*Complete preceding section(s) first.*

Submit Application and Supporting Documents.

Submit Application

*Complete preceding section(s) first.*

**WHILE NOT NECESSARY TO ACCEPT YOUR APPLICATION, YOU MAY BE REQUIRED TO SUPPLY THE FOLLOWING INFORMATION TO PROCESS THE APPLICATION. IF REQUESTED, PLEASE PROVIDE WITHIN 7 DAYS OF THE INFORMATION REQUEST:**

If any applicant has changed employment within the past two years, provide a copy of a current (within 1 month of the application date) pay stub for all applicants

If we need additional income information, you may be asked to provide copies of your Federal income tax returns, including all schedules

**IF SBA APPROVES YOUR LOAN, WE MAY REQUIRE THE FOLLOWING ITEMS BEFORE LOAN CLOSING. WE WILL ADVISE YOU IN WRITING, OF THE DOCUMENTS WE NEED.**



# Request for Transcript of Tax Return

Disaster Loan Application #2000003700 Progress 

Save

## Request for Transcript of Tax Return

SBA requires you to complete the IRS Form 4506-T as a part of your disaster loan application submission. The form authorizes the IRS to provide federal income tax information directly to SBA. Please use this page to enter the additional data needed to populate IRS Form 4506-T.

Name shown on tax return. If a joint return, the name shown first.

JOHN W JONES Jr.

First SSN, individual taxpayer identification number, or employer identification number

123-45-6789

Current address (including apt., room, or suite no.), city, state, and ZIP code

101 HOMETOWN ST, HERNDON, VA 20170

Previous address shown on the last return filed if different from current address

Address Line 1

Address Line 2

City

State

Zip Code

Tax Form Number(s)

1040

Year or period requested

2018, 2017

### Signature of taxpayer(s).

I declare that I am either the taxpayer whose name is shown on line 1a or 2a, or a person authorized to obtain the tax information requested. If the request applies to a joint return, at least one spouse must sign. If signed by a corporate officer, 1 percent or more shareholder, partner, managing member, guardian, tax matters partner, executor, receiver, administrator, trustee, or party other than the taxpayer, I certify that I have the authority to execute Form 4506-T on behalf of the taxpayer.

**NOTE:** For transcripts being sent to a third party, this form must be received within 120 days of the signature date.

\*  Signatory attests that he/she has read the attestation clause and upon so reading declares that he/she has the authority to sign the Form 4506-T.

Previous

Next

Submit form 4506T. If the eSign option populates click through until the document is successfully completed

# Request for Transcript of Tax Return - Download / Upload

If you don't do the form online the process stops until your document is delivered to the SBA

## **ALERT - Documents Required**

This is a required document. The signed copy of this document must be manually delivered to the SBA by one of the methods specified for your region as outlined on the document delivery options link on this page.

Be sure to include your full name and application number on all correspondence submitted to the SBA.

**NOTE:** You may still submit your application online, however, the approval process **WILL NOT BEGIN** until this document has been provided to the SBA.

I Understand

# Request for Transcript of Tax Return - Download / Upload

Upload your form

'Successfully Uploaded' will appear when finished.

Disaster Loan Application #2000003700 Progress  Save

## Request for Transcript of Tax Return - Download / Upload

- Download the completed **Request for Transcript Of Tax Return** for **JOHN WESLEY JONES Jr.**  
The data collection for **your** Request for Transcript of Tax Return (IRS Form 4506-T) is complete.  
Click the download button below to save **your** document.  
[Download](#)
- Sign and date the document.  
Once downloaded and printed, be sure to **sign** and **date** the document.
- Include the signed document with your application.  
Scan and attach your signed **Request for Transcript of Tax Return (IRS Form 4506-T)**.  
File Name  
[Browse ...](#) ELA2000003700-JOHN W JONES Jr.-Request for Transcript of Tax Return [Upload](#)  
Attached file must be an unprotected file in PDF format less than 38MB.

OR

If you are unable to attach a signed copy of the printed document, you may skip this step and submit it offline by other methods outlined in the [document delivery options](#) page.

The signed paper document must be received by the SBA before processing of your application can begin.

I agree to deliver a copy of the completed document to the SBA.

[Previous](#) [Next](#)

Disaster Loan Application #2000003700 Progress  Save

!!! ALERT !!! Please save your data by clicking the SAVE button shown in the upper right.

## Request for Transcript of Tax Return - Download / Upload

- Download the completed **Request for Transcript Of Tax Return** for **JOHN WESLEY JONES Jr.**  
The data collection for **your** Request for Transcript of Tax Return (IRS Form 4506-T) is complete.  
Click the download button below to save **your** document.  
[Download](#)
- Sign and date the document.  
Once downloaded and printed, be sure to **sign** and **date** the document.
- Include the signed document with your application.  
**Your document has been successfully uploaded.**  
The file [ELA2000003700-JOHN W JONES Jr.-Request for Transcript of Tax Return.pdf](#) has been associated with your application.  
[Remove](#) this file to replace it.  
Click the Next button to continue.

[Previous](#) [Next](#)

# Filing Requirements

Once the tax returns are complete sign the final Truthful Information Statement.

Disaster Loan Application #2000003704 Progress 

## Filing Requirements

The following sections are required for all loan applications. A green check mark indicates that a section has been completed. Alternate [document delivery options](#) are available if needed.

Complete the **Disaster Home / Sole Proprietor Loan Application (SBA Form 5C)**.

✓ Disaster Home / Sole Proprietor Loan Application

Complete and sign each **Request for Transcript of Tax Return (IRS Form 4506-T)** shown below. This income information, obtained from the IRS, will help us determine your repayment ability.

✓ JOHN WESLEY JONES Jr. Document attached

✓ JWJ BULDERS Document attached

Read and accept the Truthful Information Certification.

Truthful Information Certification

Submit Application and Supporting Documents.

Submit Application Complete preceding section(s) first.

**WHILE NOT NECESSARY TO ACCEPT YOUR APPLICATION, YOU MAY BE REQUIRED TO SUPPLY THE FOLLOWING INFORMATION TO PROCESS THE APPLICATION. IF REQUESTED, PLEASE PROVIDE WITHIN 7 DAYS OF THE INFORMATION REQUEST:**

Disaster Loan Application #2000003700 Progress 

## Certification as to Truthful Information

By certifying this application, you certify that all information in your application and submitted with your application is true and correct to the best of your knowledge, and that you will submit truthful information in the future.

**WARNING:** Whoever wrongfully misapplies the proceeds of an SBA disaster loan shall be civilly liable to the Administrator in an amount equal to one-and-one half times the original principal amount of the loan under 15 U.S.C. 636(b). In addition, any false statement or misrepresentation to SBA may result in criminal, civil or administrative sanctions including, but not limited to: 1) fines and imprisonment, or both, under 15 U.S.C. 645, 18 U.S.C. 1001, 18 U.S.C. 1014, 18 U.S.C. 1040, 18 U.S.C. 3571, and any other applicable laws; 2) treble damages and civil penalties under the False Claims Act, 31 U.S.C. 3729; 3) double damages and civil penalties under the Program Fraud Civil Remedies Act, 31 U.S.C. 3802; and 4) suspension and/or debarment from all Federal procurement and non-procurement transactions. Statutory fines may increase if amended by the Federal Civil Penalties Inflation Adjustment Act Improvements Act of 2015

I Certify

# Submit Application

You may complete when the "Submit" icon appears.

Disaster Loan Application #2000003700 Progress 

## Filing Requirements

The following sections are required for all loan applications. A green check mark indicates that a section has been completed. Alternate [document delivery options](#) are available if needed.

Complete the **Disaster Home / Sole Proprietor Loan Application (SBA Form 5C)**.

✓ Disaster Home / Sole Proprietor Loan Application

Update

Complete and sign each **Request for Transcript of Tax Return (IRS Form 4506-T)** shown below. This income information, obtained from the IRS, will help us determine your repayment ability.

✓ JOHN WESLEY JONES Jr.

Document attached

Update

Read and accept the Truthful Information Certification.

✓ Truthful Information Certification

Update

Submit Application and Supporting Documents.

Preview Electronic Loan Application

Preview

Submit Application

Submit

# Application Submission Confirmation

After submission you will see that your application number has been submitted.

The screenshot shows the SBA U.S. Small Business Administration website. The top navigation bar includes links for Loan Information, Search Declarations, Apply Online, and Message Center (with a notification badge). The main heading is "Disaster Loan Assistance" with a subtitle "Federal Disaster Loans for Businesses, Private Nonprofits, Homeowners, and Renters". Below this is a progress bar for "Disaster Loan Application #2000003700" which is partially filled. The main content area is titled "Application Submission Confirmation" and contains the following text: "Application number 2000003700 has been submitted.", "Please download and retain [your submitted document\(s\)](#) for your records.", "Click [here](#) to return to your home page.", and "If you are finished, you can [log out of the application](#). Logging out of the application will clear your activity from your browser's memory. This is especially important if you use a shared or public computer."

# Application Successfully Submitted

After application is successfully submitted this page shows a message indicator, which confirms submittal of the application

The screenshot shows the top navigation bar with the SBA logo and links for Loan Information, Search Declarations, Apply Online, and Message Center. The Message Center link has a red circle and a '1' indicator. Below the navigation is the main heading 'Disaster Loan Assistance' and a progress bar for application #2000003701. The main content area is titled 'Application Submission Confirmation' and contains the following text:

Application number 2000003701 has been submitted.

Please download and retain [your submitted document\(s\)](#) for your records.

Click [here](#) to return to your home page.

If you are finished, you can [log out of the application](#). Logging out of the application will clear your activity from your browser's memory. This is especially important if you use a shared or public computer.

The screenshot shows the Message Center section of the SBA Disaster Loan Assistance page. It includes a table with one message and a 'Home Page' button.

| Subject                                              | Received              |                        |
|------------------------------------------------------|-----------------------|------------------------|
| SBA Application No. 2000003701 - Submit Confirmation | 3/15/2020 11:09:29 AM | <a href="#">Delete</a> |

[« Home Page](#)

Checking Status



# Home Page

## Disaster Loan Assistance

Federal Disaster Loans for Businesses, Private Nonprofits, Homeowners, and Renters

Hello, John

### My Applications & Loans

#### Business Application #2000003704

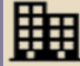

Applicant: **JONES, JOHN WESLEY**  
Status: **SUBMITTED**

Last Updated: 3/15/2020

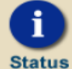

Status

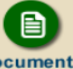

Documents

#### Home Application #2000003700

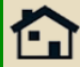

Applicant: **JONES, JOHN WESLEY**  
Status: **RECEIVED-IN REVIEW**

Last Updated: 3/15/2020

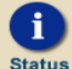

Status

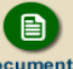

Documents

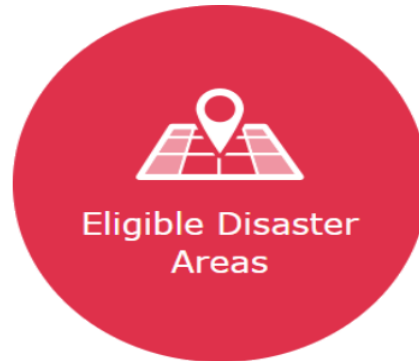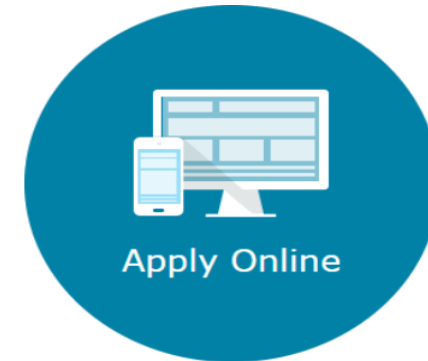

Click the  
"Status" icon on  
the Disaster  
Loan home page

# Application Status

## Disaster Loan Assistance

Federal Disaster Loans for Businesses, Private Nonprofits, Homeowners, and Renters

### Application Status

**Current Application Status: RECEIVED-IN REVIEW**

**Application Number:** 2000003700  
**Loan Type:** Home  
**Disaster Name:** VA-00485 - 2020 AGENCY DISASTER IN VIRGINIA GEO - 1.50  
**Status Change Date:** March 14, 2020  
**Status Description:** We received your SBA disaster loan application and we are reviewing it to make sure you have submitted the required documents needed to process your loan request. We will contact you if you need to submit additional information in order to complete your loan application.

[« Home Page](#)
